# Supplementary material
Source: PubMed Central journal article supplement (PMC4020041)
Supplement: 1319089111_pnas.201319089SI.pdf [file 1319089111_pnas.201319089SI.pdf]

# Supporting Information

Springer and van Vliet 10.1073/pnas.1319089111

**Table S1. Annual catch (tonnes) and estimated run size (catch plus escapement, millions) of eastern Kamchatka pink salmon**

| Year | Catch   | Run size |
|------|---------|----------|
| 1971 | 18,829  | 30.8     |
| 1972 | 1,970   | 13.1     |
| 1973 | 31,150  | 20.5     |
| 1974 | 5,700   | 19.4     |
| 1975 | 40,407  | 46.8     |
| 1976 | 6,900   | 23.3     |
| 1977 | 30,100  | 57.7     |
| 1978 | 9,000   | 12.5     |
| 1979 | 39,400  | 59.1     |
| 1980 | 3,500   | 5.0      |
| 1981 | 41,500  | 65.0     |
| 1982 | 10,200  | 17.8     |
| 1983 | 25,700  | 41.6     |
| 1984 | 11,900  | 29.8     |
| 1985 | 18,300  | 24.8     |
| 1986 | 2,500   | 4.4      |
| 1987 | 34,700  | 56.3     |
| 1988 | 6,500   | 9.5      |
| 1989 | 57,500  | 68.8     |
| 1990 | 17,600  | 27.5     |
| 1991 | 74,700  | 97.2     |
| 1992 | 8,600   | 9.9      |
| 1993 | 52,173  | 69.8     |
| 1994 | 12,047  | 21.2     |
| 1995 | 51,244  | 78.0     |
| 1996 | 10,181  | 15.9     |
| 1997 | 82,798  | 99.7     |
| 1998 | 6,778   | 13.3     |
| 1999 | 83,640  | 107.6    |
| 2000 | 1,186   | 1.8      |
| 2001 | 42,714  | 43.4     |
| 2002 | 2,284   | 4.7      |
| 2003 | 56,709  | 66.7     |
| 2004 | 6,037   | 22.8     |
| 2005 | 47,403  | 100.5    |
| 2006 | 13,609  | 22.8     |
| 2007 | 72,712  | 93.7     |
| 2008 | 7,911   | 15.9     |
| 2009 | 138,886 | 173.1    |
| 2010 | 6,838   | 14.6     |
| 2011 | 182,365 | 225.3    |
| 2012 | 18,279  | 28.4     |

Catch data for 1971–2009 were reported in ref. 1; catch data for 2010–2012 were communicated by G. Khen. Run size for 1971–2005 reported in ref. 2. Run size for 2006–2012 was estimated from the relationship between catch and run size in 1971–2005, where run size =  $(0.0012 \times \text{catch}) + 6.42$ ;  $r^2 = 0.90$ ,  $P < 0.0001$ .

1. Khen GV, Basyuk EO, Vanin NS, Matveev VI (2013) Hydrography and biological resources in the western Bering Sea. *Deep Sea Res Part II Top Stud Oceanogr* 94:106–120.
2. Ruggerone GT, Peterman RM, Dorner B, Myers KW, Mantua NJ (2010) *Abundance of Adult Hatchery and Wild Salmon by Region of the North Pacific* (School of Aquatic and Fisheries Sciences, Univ of Washington, Seattle), Report SAFS-UW-1001.

**Table S2. Seabird breeding parameters in even years and odd years**

| Island            | Guild                     | Common name              | Scientific name                  | Abbreviation             | Years     | Clutch size    |                  |          |  |
|-------------------|---------------------------|--------------------------|----------------------------------|--------------------------|-----------|----------------|------------------|----------|--|
|                   |                           |                          |                                  |                          |           | Even           | Odd              | <i>P</i> |  |
| Buldir Island     | Omnivore                  | Fork-tailed storm-petrel | <i>Oceanodroma furcata</i>       | FTSP                     | 1990–2012 | na             |                  |          |  |
|                   |                           | Leach's storm-petrel     | <i>Oceanodroma leucorhoa</i>     | LESP                     | 1989–2012 | na             |                  |          |  |
|                   |                           | Red-faced cormorant      | <i>Phalacrocorax urile</i>       | RFCO                     | 2003–2012 | $2.6 \pm 0.21$ | $2.3 \pm 0.0.28$ | 0.34     |  |
|                   |                           | Pelagic cormorant        | <i>Phalacrocorax pelagicus</i>   | PECO                     | 1990–2012 | $2.1 \pm 0.07$ | $2.1 \pm 0.10$   | 0.98     |  |
|                   |                           | Black-legged kittiwake   | <i>Rissa tridactyla</i>          | BLKI                     | 1988–2012 | $1.7 \pm 0.03$ | $1.4 \pm 0.04$   | <0.0001  |  |
|                   |                           | Red-legged kittiwake     | <i>Rissa brevirostris</i>        | RLKI                     | 1988–2012 | na             |                  |          |  |
|                   |                           | Glaucous-winged gull     | <i>Larus glaucescens</i>         | GWGU                     | 1997–2012 | $2.6 \pm 0.09$ | $2.4 \pm 0.4$    | 0.028    |  |
|                   |                           | Thick-billed murre       | <i>Uria lomvia</i>               | TBMU                     | 1988–2012 | na             |                  |          |  |
|                   |                           | Horned puffin            | <i>Fratercula corniculata</i>    | HOPU                     | 1988–2012 | na             |                  |          |  |
|                   |                           | Tufted puffin            | <i>Fratercula cirrhata</i>       | TUPU                     | 1988–2012 | na             |                  |          |  |
|                   |                           | Planktivore              | Parakeet auklet                  | <i>Aethia psittacula</i> | PAAU      | 1991–2012      | na               |          |  |
|                   |                           |                          | Least auklet                     | <i>Aethia pusilla</i>    | LEAU      | 1988–2012      | na               |          |  |
| Whiskered auklet  | <i>Aethia pygmaea</i>     |                          | WHAU                             | 1991–2012                | na        |                |                  |          |  |
| Crested auklet    | <i>Aethia cristatella</i> |                          | CRAU                             | 1988–2012                | na        |                |                  |          |  |
| Aiktak Island     | Omnivore                  | Fork-tailed storm-petrel | <i>Oceanodroma furcata</i>       | FTSP                     | 1995–2011 | na             |                  |          |  |
|                   |                           | Leach's storm-petrel     | <i>Oceanodroma leucorhoa</i>     | LESP                     | 1995–2011 | na             |                  |          |  |
|                   |                           | Glaucous-winged gull     | <i>Larus glaucescens</i>         | GWGU                     | 1995–2011 | $2.2 \pm 0.20$ | $2.2 \pm 0.14$   | 0.96     |  |
|                   |                           | Ancient murrelet         | <i>Synthliboramphus antiquus</i> | ANMU                     | 1997–2011 | $2.0 \pm 0.02$ | $1.9 \pm 0.02$   | 0.22     |  |
|                   |                           | Tufted puffin            | <i>Fratercula cirrhata</i>       | TUPU                     | 1995–2011 | na             |                  |          |  |
| St. George Island | Omnivore                  | Black-legged kittiwake   | <i>Rissa tridactyla</i>          | BLKI                     | 1984–2012 | $1.6 \pm 0.06$ | $1.3 \pm 0.06$   | 0.011    |  |
|                   |                           | Red-legged kittiwake     | <i>Rissa brevirostris</i>        | RLKI                     | 1984–2012 | na             |                  |          |  |
|                   |                           | Common murre             | <i>Uria aalge</i>                | COMU                     | 1985–2012 | na             |                  |          |  |
|                   |                           | Thick-billed murre       | <i>Uria lomvia</i>               | TBMU                     | 1984–2012 | na             |                  |          |  |
|                   |                           | Least auklet             | <i>Aethia pusilla</i>            | LEAU                     | 2008–2012 | na             |                  |          |  |
| St. Paul Island   | Omnivore                  | Red-faced cormorant      | <i>Phalacrocorax urile</i>       | RFCO                     | 1987–2012 | $2.9 \pm 0.10$ | $2.9 \pm 0.10$   | 0.93     |  |
|                   |                           | Black-legged kittiwake   | <i>Rissa tridactyla</i>          | BLKI                     | 1984–2012 | $1.6 \pm 0.06$ | $1.4 \pm 0.06$   | 0.030    |  |
|                   |                           | Red-legged kittiwake     | <i>Rissa brevirostris</i>        | RLKI                     | 1984–2012 | na             |                  |          |  |
|                   |                           | Common murre             | <i>Uria aalge</i>                | COMU                     | 1985–2012 | na             |                  |          |  |
|                   |                           | Thick-billed murre       | <i>Uria lomvia</i>               | TBMU                     | 1984–2012 | na             |                  |          |  |

Mean  $\pm$  SEM; Student *t* test *P*. Data are from refs. 1–4. Parameter values in italics are different at  $P \leq 0.10$ . na, not applicable because clutch sizes = 1; un, unknown.

1. Warzybok JA, Drummond BA, Williams JC (2013) Biological monitoring at Buldir Island, Alaska in 2012. *U.S. Fish and Wildlife Service Report*, AMNWR 2012/02 (U.S. Fish and Wildlife Service, Alaska Maritime National Wildlife Refuge, Homer, AK). Available at <https://absilcc.org/science/amnwr/sitepages/library.aspx>. Accessed February 25, 2013.
2. Bechaver CA, Gehrig JM (2011) Biological monitoring at Aiktak Island, Alaska in 2011. *U.S. Fish and Wildlife Service Report*, AMNWR 2011/12 (U.S. Fish and Wildlife Service, Alaska Maritime National Wildlife Refuge, Homer, AK). Available at <https://absilcc.org/science/amnwr/sitepages/library.aspx>. Accessed October 19, 2011.
3. Klostermann MR, Drummond BA (2012) Biological monitoring at St. George Island, Alaska in 2012. *U.S. Fish and Wildlife Service Report*, AMNWR 2012/08 (U.S. Fish and Wildlife Service, Alaska Maritime National Wildlife Refuge, Homer, AK). Available at <https://absilcc.org/science/amnwr/sitepages/library.aspx>. Accessed April 26, 2013.
4. Thomson G, Drummond BA (2012) Biological monitoring at St. Paul Island, Alaska in 2012. *U.S. Fish and Wildlife Service Report*, AMNWR 2012/09 (U.S. Fish and Wildlife Service, Alaska Maritime National Wildlife Refuge, Homer, AK). Available at <https://absilcc.org/science/amnwr/sitepages/library.aspx>. Accessed April 26, 2013.



**Table S4. Seabird breeding parameter relationships to pink salmon abundance**

| Island            | Years       | Clutch size    |      | Hatch date*    |        | Laying success <sup>†</sup> |        | Hatching success <sup>‡</sup> |        | Fledging success <sup>§</sup> |        | Productivity <sup>¶</sup> |        |        |
|-------------------|-------------|----------------|------|----------------|--------|-----------------------------|--------|-------------------------------|--------|-------------------------------|--------|---------------------------|--------|--------|
|                   |             | r <sup>2</sup> | P    | r <sup>2</sup> | P      | r <sup>2</sup>              | P      | r <sup>2</sup>                | P      | r <sup>2</sup>                | P      | r <sup>2</sup>            | P      |        |
| Buldir Island     | Omnivore    |                |      |                |        |                             |        |                               |        |                               |        |                           |        |        |
|                   | BLKI        | 1988–2012      | 0.52 | <0.0001        | 0.53   | <0.0001                     | 0.32   | 0.0035                        | 0.37   | 0.0012                        | 0.0047 | 0.74                      | 0.19   | 0.028  |
|                   | RLKI        | 1988–2012      | na   |                | 0.29   | 0.0065                      | 0.45   | 0.0002                        | 0.26   | 0.0093                        | 0.0069 | 0.69                      | 0.20   | 0.027  |
|                   | GWGU        | 1997–2012      | 0.28 | 0.044          | 0.21   | 0.27                        | 0.35   | 0.033                         | 0.025  | 0.57                          | un     |                           | un     |        |
|                   | TBMU        | 1988–2012      | na   |                | 0.51   | <0.0001                     | un     |                               | 0.042  | 0.33                          | 0.068  | 0.21                      | 0.046  | 0.74   |
|                   | HOPU        | 1988–2012      | na   |                | 0.29   | 0.0067                      | un     |                               | 0.056  | 0.26                          | 0.093  | 0.14                      | 0.11   | 0.10   |
|                   | TUPU        | 1988–2012      | na   |                | 0.51   | <0.0001                     | un     |                               | 0.43   | 0.0003                        | 0.16   | 0.050                     | 0.26   | 0.0090 |
|                   | Planktivore |                |      |                |        |                             |        |                               |        |                               |        |                           |        |        |
|                   | PAAU        | 1991–2012      | na   |                | 0.0019 | 0.63                        | un     |                               | 0.030  | 0.54                          | 0.038  | 0.49                      | 0.0098 | 0.72   |
| LEAU              | 1988–2012   | na             |      | 0.19           | 0.10   | un                          |        | 0.053                         | 0.41   | 0.024                         | 0.58   | 0.062                     | 0.37   |        |
| WHAU              | 1991–2012   | na             |      | 0.025          | 0.58   | un                          |        | 0.0029                        | 0.85   | 0.049                         | 0.43   | 0.026                     | 0.56   |        |
| CRAU              | 1988–2012   | na             |      | 0.23           | 0.067  | un                          |        | 0.023                         | 0.59   | 0.0024                        | 0.87   | 0.0015                    | 0.89   |        |
| Aiktak Island     | Omnivore    |                |      |                |        |                             |        |                               |        |                               |        |                           |        |        |
|                   | FTSP        | 1996–2012      | na   |                | 0.21   | 0.076                       | un     |                               | 0.20   | 0.15                          | un     |                           | un     |        |
|                   | ANMU        | 1997–2012      | na   |                | 0.0002 | 0.99                        | un     |                               | 0.15   | 0.15                          | 0.11   | 0.22                      | 0.10   | 0.25   |
| TUPU              | 1995–2012   | na             |      | 0.0096         | 0.72   | un                          |        | 0.29                          | 0.031  | 0.0088                        | 0.73   | 0.052                     | 0.40   |        |
| St. George Island | Omnivore    |                |      |                |        |                             |        |                               |        |                               |        |                           |        |        |
|                   | BLKI        | 1984–2012      | 0.23 | 0.0081         | 0.054  | 0.23                        | 0.24   | 0.0073                        | 0.40   | 0.0002                        | 0.078  | 0.14                      | 0.33   | 0.0011 |
|                   | RLKI        | 1984–2012      | na   |                | 0.0001 | 0.95                        | 0.038  | 0.21                          | 0.28   | 0.0036                        | 0.11   | 0.056                     | 0.32   | 0.0015 |
|                   | COMU        | 1985–2012      | na   |                | 0.0099 | 0.62                        | un     |                               | 0.0020 | 0.82                          | 0.0074 | 0.67                      | 0.0009 | 0.88   |
|                   | TBMU        | 1984–2012      | na   |                | 0.011  | 0.60                        | un     |                               | 0.0020 | 0.94                          | 0.0002 | 0.95                      | 0.0002 | 0.94   |
| Planktivore       |             |                |      |                |        |                             |        |                               |        |                               |        |                           |        |        |
| LEAU              | 2008–2012   | na             |      | 0.37           | 0.27   | un                          |        | 0.094                         | 0.62   | 0.89                          | 0.015  | 0.91                      | 0.013  |        |
| St. Paul Island   | Omnivore    |                |      |                |        |                             |        |                               |        |                               |        |                           |        |        |
|                   | RFCO        | 1987–2012      | un   |                | 0.0008 | 0.91                        | 0.0001 | 0.99                          | 0.067  | 0.26                          | 0.0076 | 0.71                      | 0.020  | 0.52   |
|                   | BLKI        | 1984–2012      | 0.10 | 0.12           | 0.10   | 0.13                        | 0.14   | 0.062                         | 0.44   | 0.0003                        | 0.31   | 0.0040                    | 0.44   | 0.0002 |
|                   | RLKI        | 1984–2012      | na   |                | 0.0028 | 0.81                        | 0.031  | 0.40                          | 0.33   | 0.0066                        | 0.18   | 0.056                     | 0.32   | 0.0019 |
| TBMU              | 1984–2012   | na             |      | 0.022          | 0.48   | un                          |        | 0.0045                        | 0.75   | 0.064                         | 0.22   | 0.0001                    | 0.99   |        |

Linear regression; annual salmon run values log normal transformed; slopes of relationships are positive or flat for hatch date and negative or flat for all other parameters. Salmon data are from refs. 1 and 2, and Table S1; seabird data are from refs. 3–6. Parameters with values in italics had differences in mean values between even and odd years at  $P \leq 0.10$  (Tables S2 and S3). Parameters for omnivores regressed against eastern Kamchatka pink salmon abundance, and for planktivores against Norton Sound pink salmon abundance. See Tables S2 and S3 for species abbreviations; na, not applicable because clutch sizes = 1; un, unknown.

\*Julian day.

<sup>†</sup>Number of nests with eggs per number of nest starts.

<sup>‡</sup>Number of eggs hatching per number of eggs laid.

<sup>§</sup>Number of chicks fledged per number of eggs hatched.

<sup>¶</sup>Number of chicks fledged per number of nest starts.

1. Ruggerone GT, Peterman RM, Dorner B, Myers KW, Mantua NJ (2010) *Abundance of Adult Hatchery and Wild Salmon by Region of the North Pacific* (School of Aquatic and Fisheries Sciences, Univ of Washington, Seattle), Report SAFS-UW-1001.
2. Khen GV, Basyuk EO, Vanin NS, Matveev VI (2013) Hydrography and biological resources in the western Bering Sea. *Deep Sea Res Part II Top Stud Oceanogr* 94:106–120.
3. Warzybok JA, Drummond BA, Williams JC (2013) Biological monitoring at Buldir Island, Alaska in 2012. *U.S. Fish and Wildlife Service Report*, AMNWR 2012/02 (U.S. Fish and Wildlife Service, Alaska Maritime National Wildlife Refuge, Homer, AK). Available at <https://absilcc.org/science/amnwr/sitepages/library.aspx>. Accessed February 25, 2013.
4. Behaver CA, Gehrig JM (2011) Biological monitoring at Aiktak Island, Alaska in 2011. *U.S. Fish and Wildlife Service Report*, AMNWR 2011/12 (U.S. Fish and Wildlife Service, Alaska Maritime National Wildlife Refuge, Homer, AK). Available at <https://absilcc.org/science/amnwr/sitepages/library.aspx>. Accessed October 19, 2011.
5. Klostermann MR, Drummond BA (2012) Biological monitoring at St. George Island, Alaska in 2012. *U.S. Fish and Wildlife Service Report*, AMNWR 2012/08 (U.S. Fish and Wildlife Service, Alaska Maritime National Wildlife Refuge, Homer, AK). Available at <https://absilcc.org/science/amnwr/sitepages/library.aspx>. Accessed April 26, 2013.
6. Thomson G, Drummond BA (2012) Biological monitoring at St. Paul Island, Alaska in 2012. *U.S. Fish and Wildlife Service Report*, AMNWR 2012/09 (U.S. Fish and Wildlife Service, Alaska Maritime National Wildlife Refuge, Homer, AK). Available at <https://absilcc.org/science/amnwr/sitepages/library.aspx>. Accessed April 26, 2013.

**Table S5. Numbers of nests built by seabirds on population monitoring plots in even years and odd years**

| Island            | Species | Years     | Even years      | Odd years       | P      | Even/odd |
|-------------------|---------|-----------|-----------------|-----------------|--------|----------|
| Buldir Island     | BLKI    | 1988–1992 | 5,949 ± 97 (3)  | 4,442 ± 10 (2)  | 0.0012 | 1.34     |
| Buldir Island     | RLKI    | 1988–1992 | 1,770 ± 69 (3)  | 1,479 ± 106 (2) | 0.092  | 1.20     |
| St. George Island | BLKI    | 1986–2011 | 1,265 ± 136 (6) | 768 ± 91 (5)    | 0.018  | 1.65     |
| St. George Island | RLKI    | 1986–2011 | 2,085 ± 315 (6) | 1,695 ± 350 (3) | 0.47   | 1.23     |
| St. Paul Island   | NOFU    | 1985–2011 | 106 ± 13 (6)    | 78 ± 5 (7)      | 0.049  | 1.36     |
| St. Paul Island   | RFCO    | 1984–2011 | 158 ± 40 (6)    | 118 ± 17 (7)    | 0.36   | 1.34     |
| St. Paul Island   | BLKI    | 1985–2011 | 1,343 ± 152 (6) | 1,031 ± 177 (6) | 0.21   | 1.30     |
| St. Paul Island   | RLKI    | 1985–2011 | 69 ± 9.8 (6)    | 63 ± 17 (6)     | 0.76   | 1.10     |

Mean ± SEM (number of years); Student t test P. Data are from refs. 1–3. See Table S2 for species abbreviations [except NOFU, Northern Fulmar (*Fulmarus glacialis*)].

1. Warzybok JA, Drummond BA, Williams JC (2013) Biological monitoring at Buldir Island, Alaska in 2012. *U.S. Fish and Wildlife Service Report, AMNWR 2012/02* (U.S. Fish and Wildlife Service, Alaska Maritime National Wildlife Refuge, Homer, AK). Available at <https://absilcc.org/science/amnwr/sitepages/library.aspx>. Accessed February 25, 2013.
2. Klostermann MR, Drummond BA (2012) Biological monitoring at St. George Island, Alaska in 2012. *U.S. Fish and Wildlife Service Report, AMNWR 2012/08* (U.S. Fish and Wildlife Service, Alaska Maritime National Wildlife Refuge, Homer, AK). Available at <https://absilcc.org/science/amnwr/sitepages/library.aspx>. Accessed April 26, 2013.
3. Thomson G, Drummond BA (2012) Biological monitoring at St. Paul Island, Alaska in 2012. *U.S. Fish and Wildlife Service Report, AMNWR 2012/09* (U.S. Fish and Wildlife Service, Alaska Maritime National Wildlife Refuge, Homer, AK). Available at <https://absilcc.org/science/amnwr/sitepages/library.aspx>. Accessed April 26, 2013.
